# Supplementary material for: Specificity of expression of TaCKX family genes in developing plants of wheat and their co-operation within and among organs
Source: PubMed Central journal article supplement (PMC6457499; doi:10.1371/journal.pone.0214239), 2019-04-10

**A**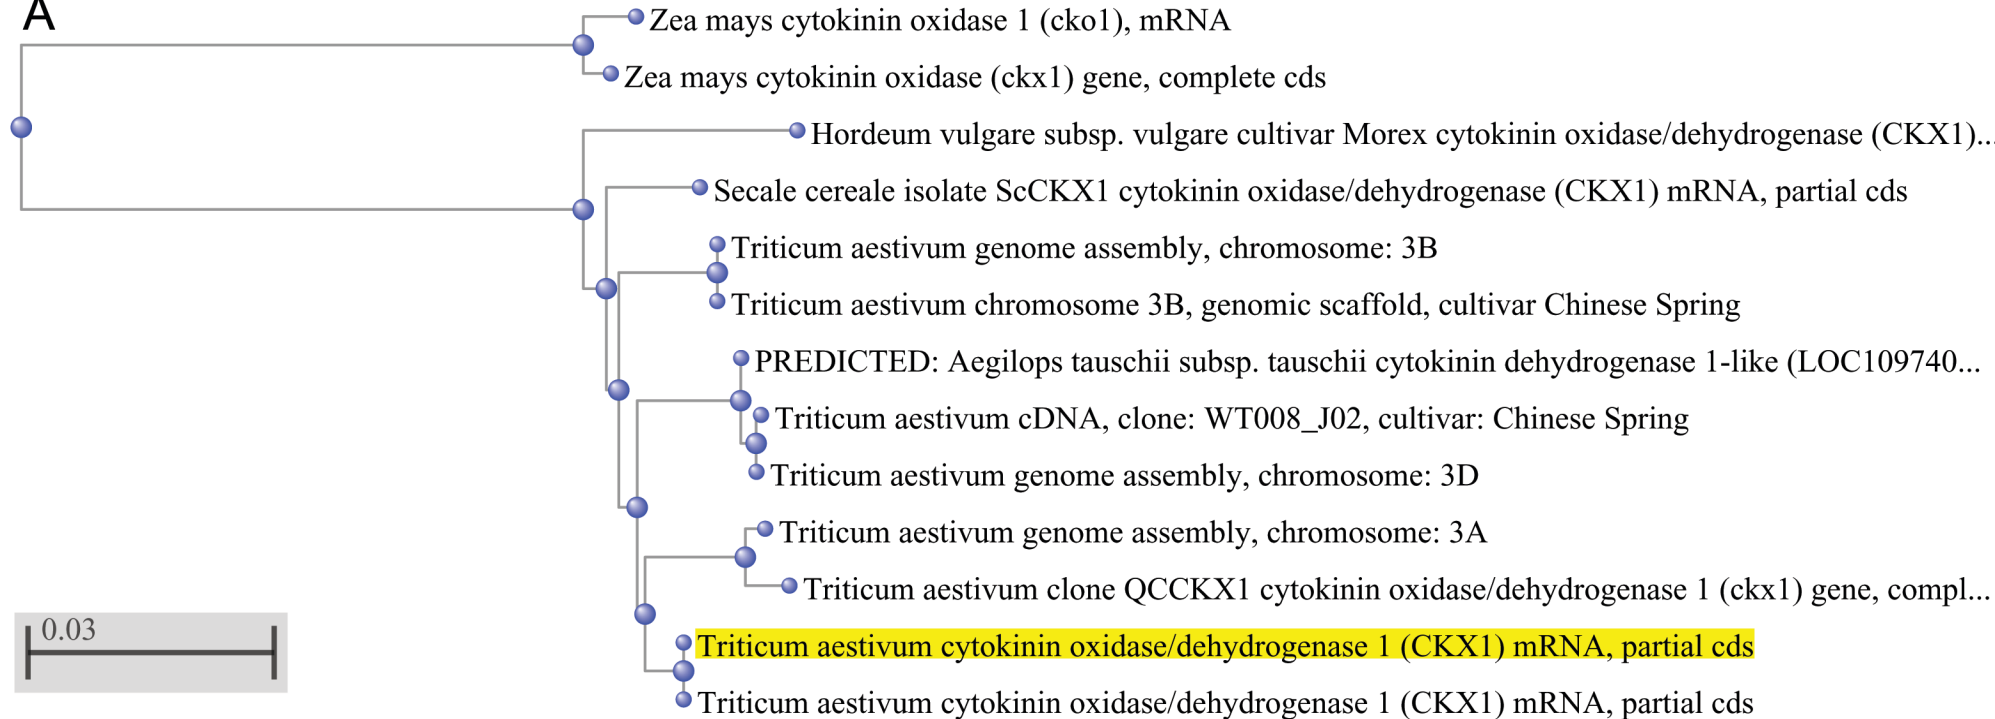

**B**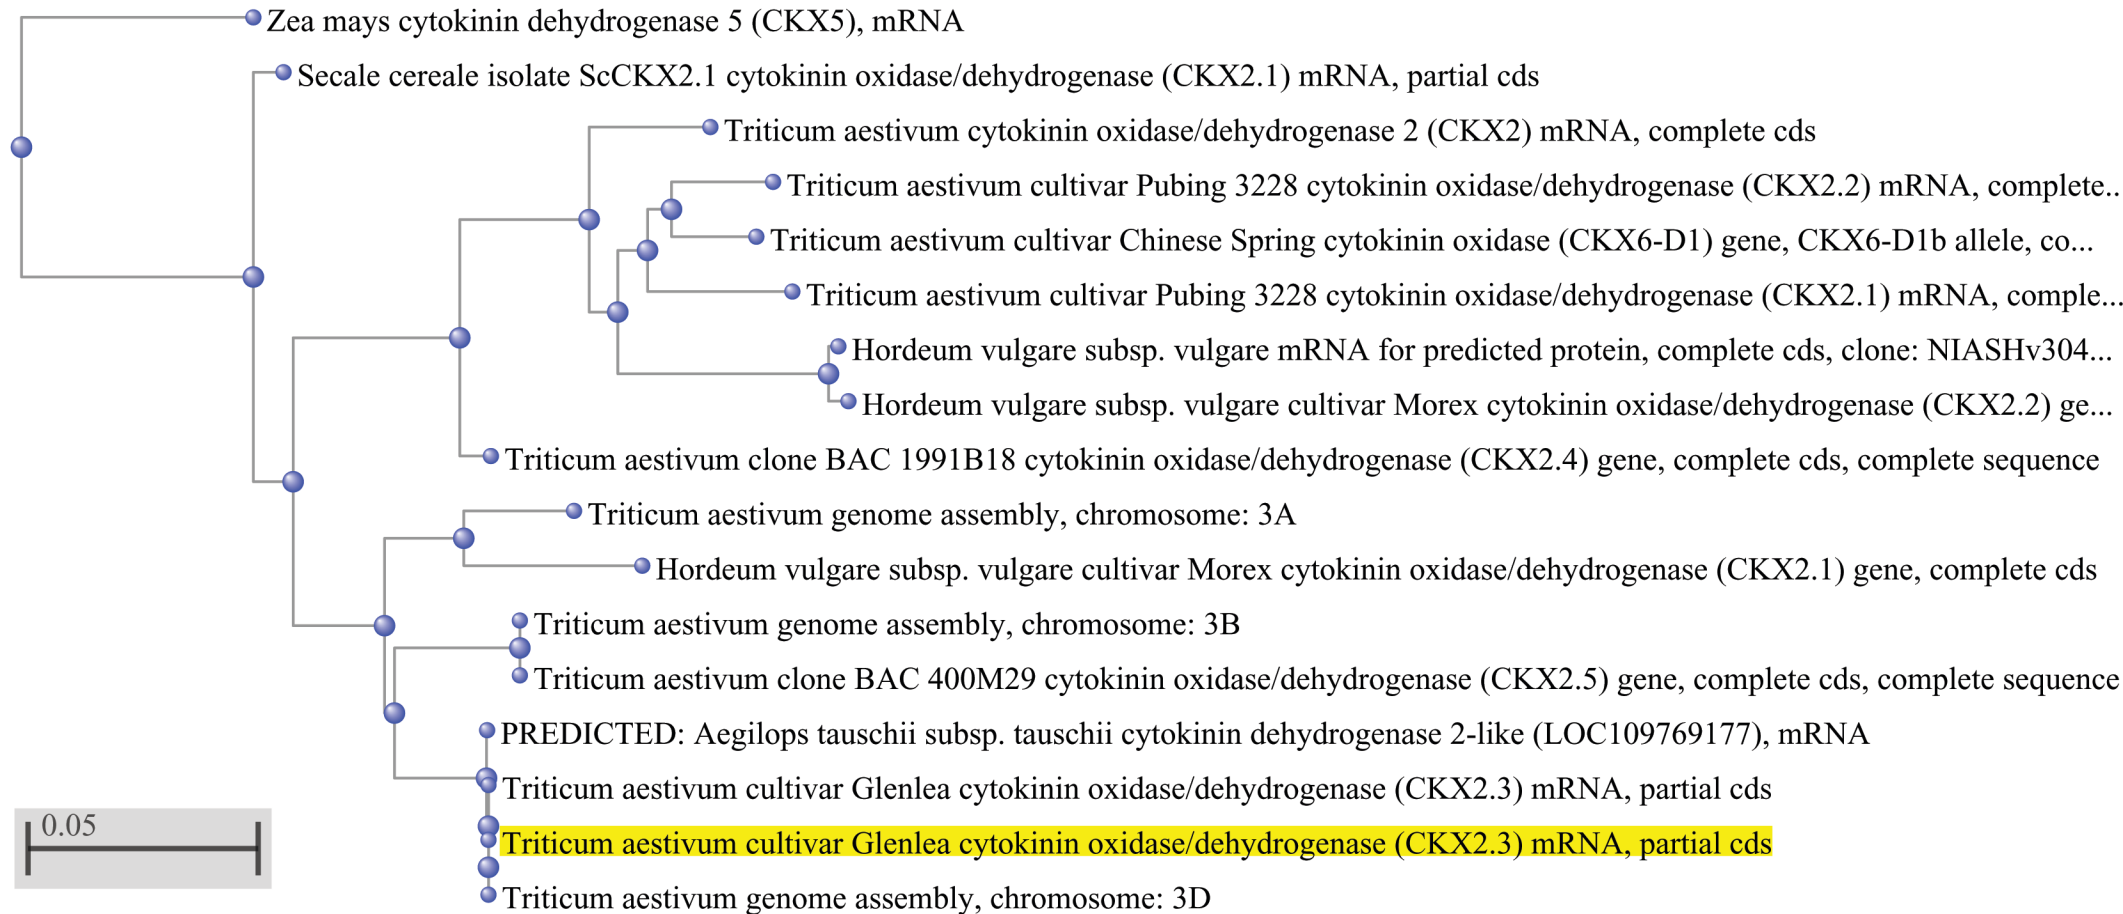

C

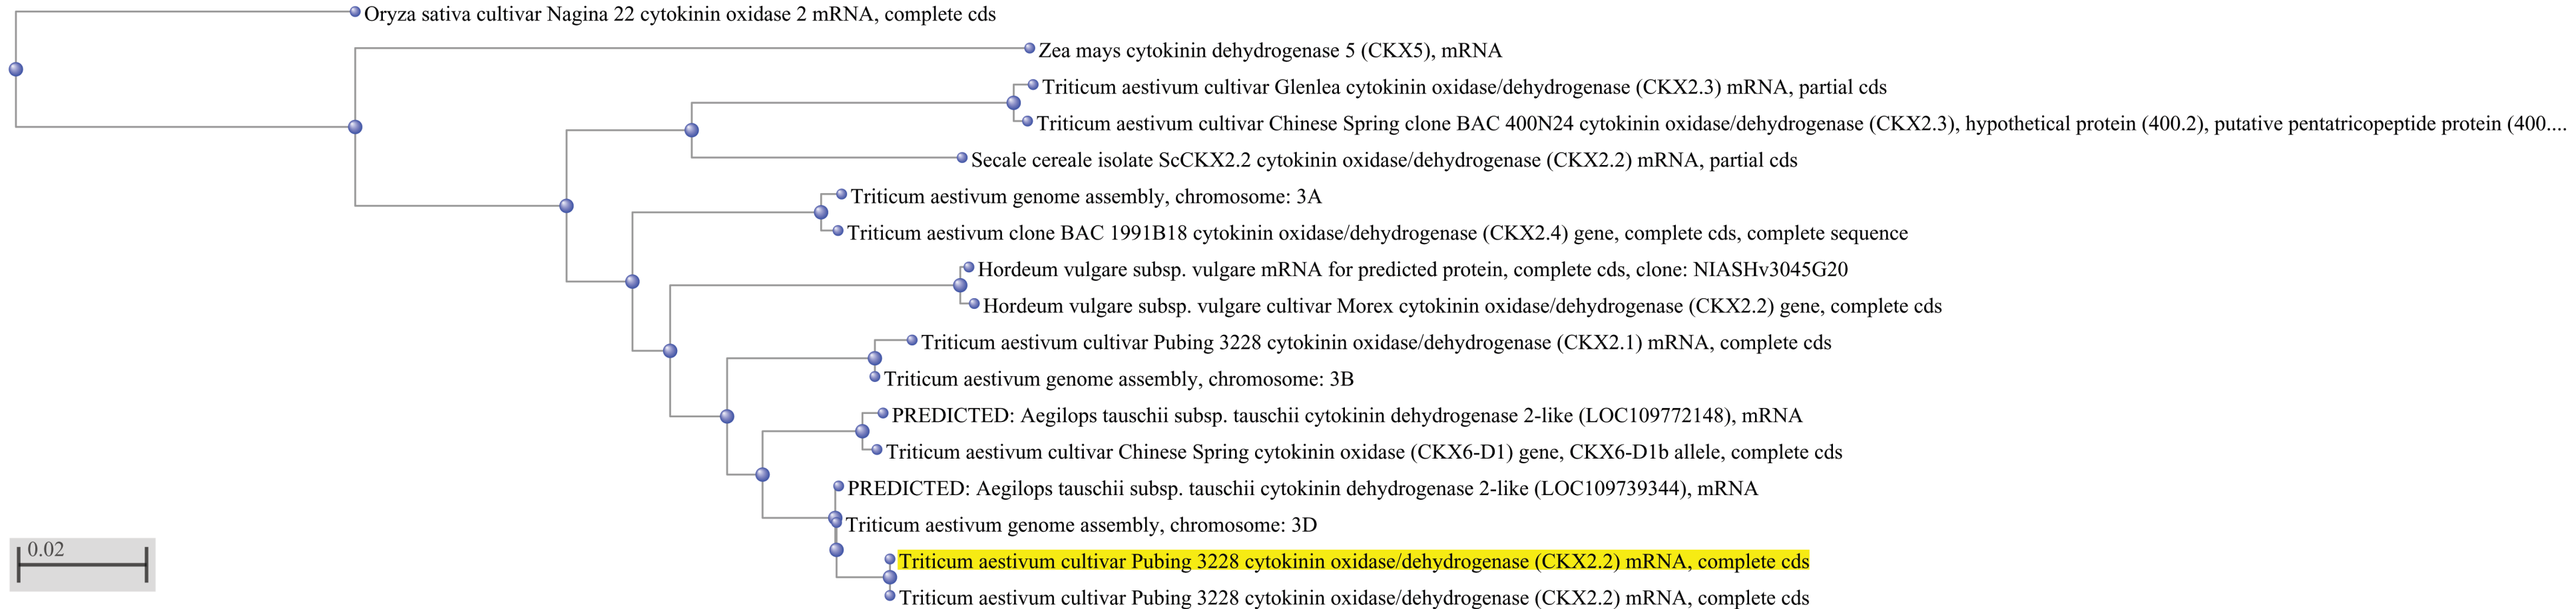

D

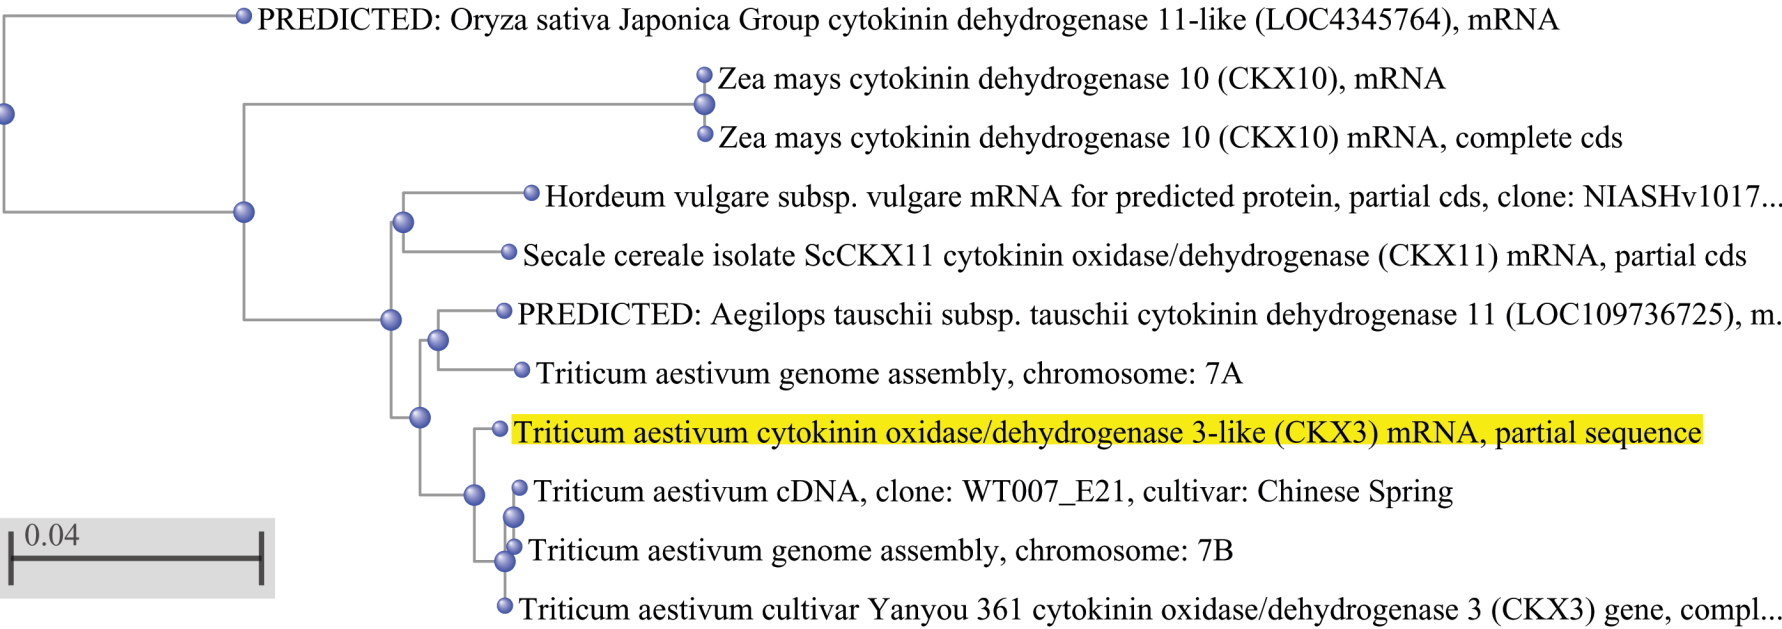

**E**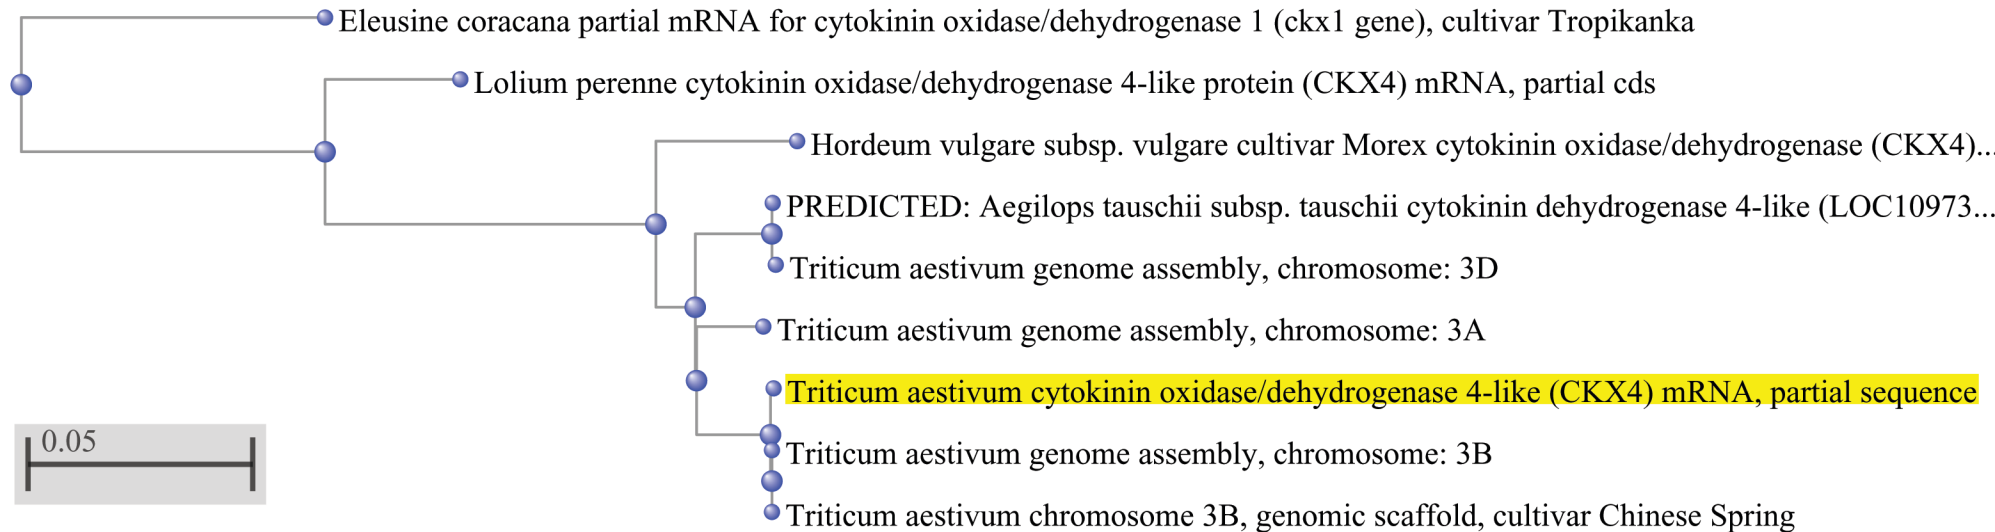

**F**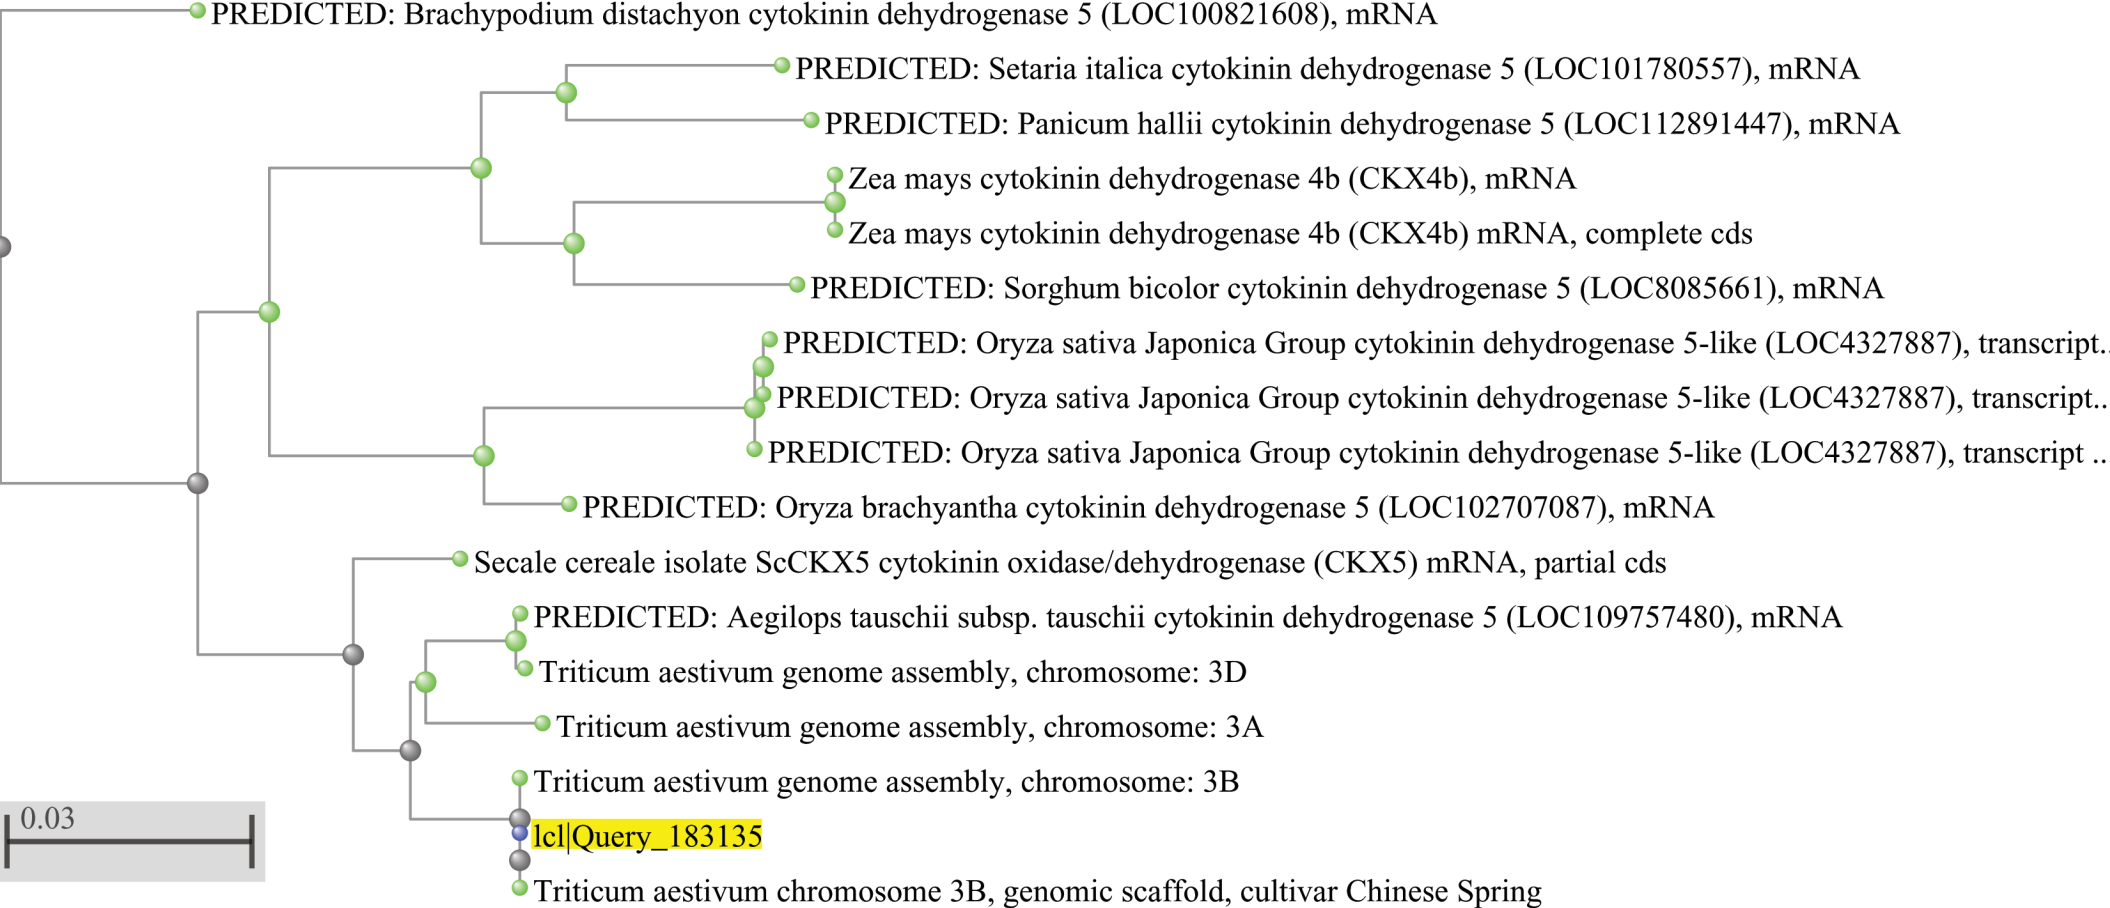

**G**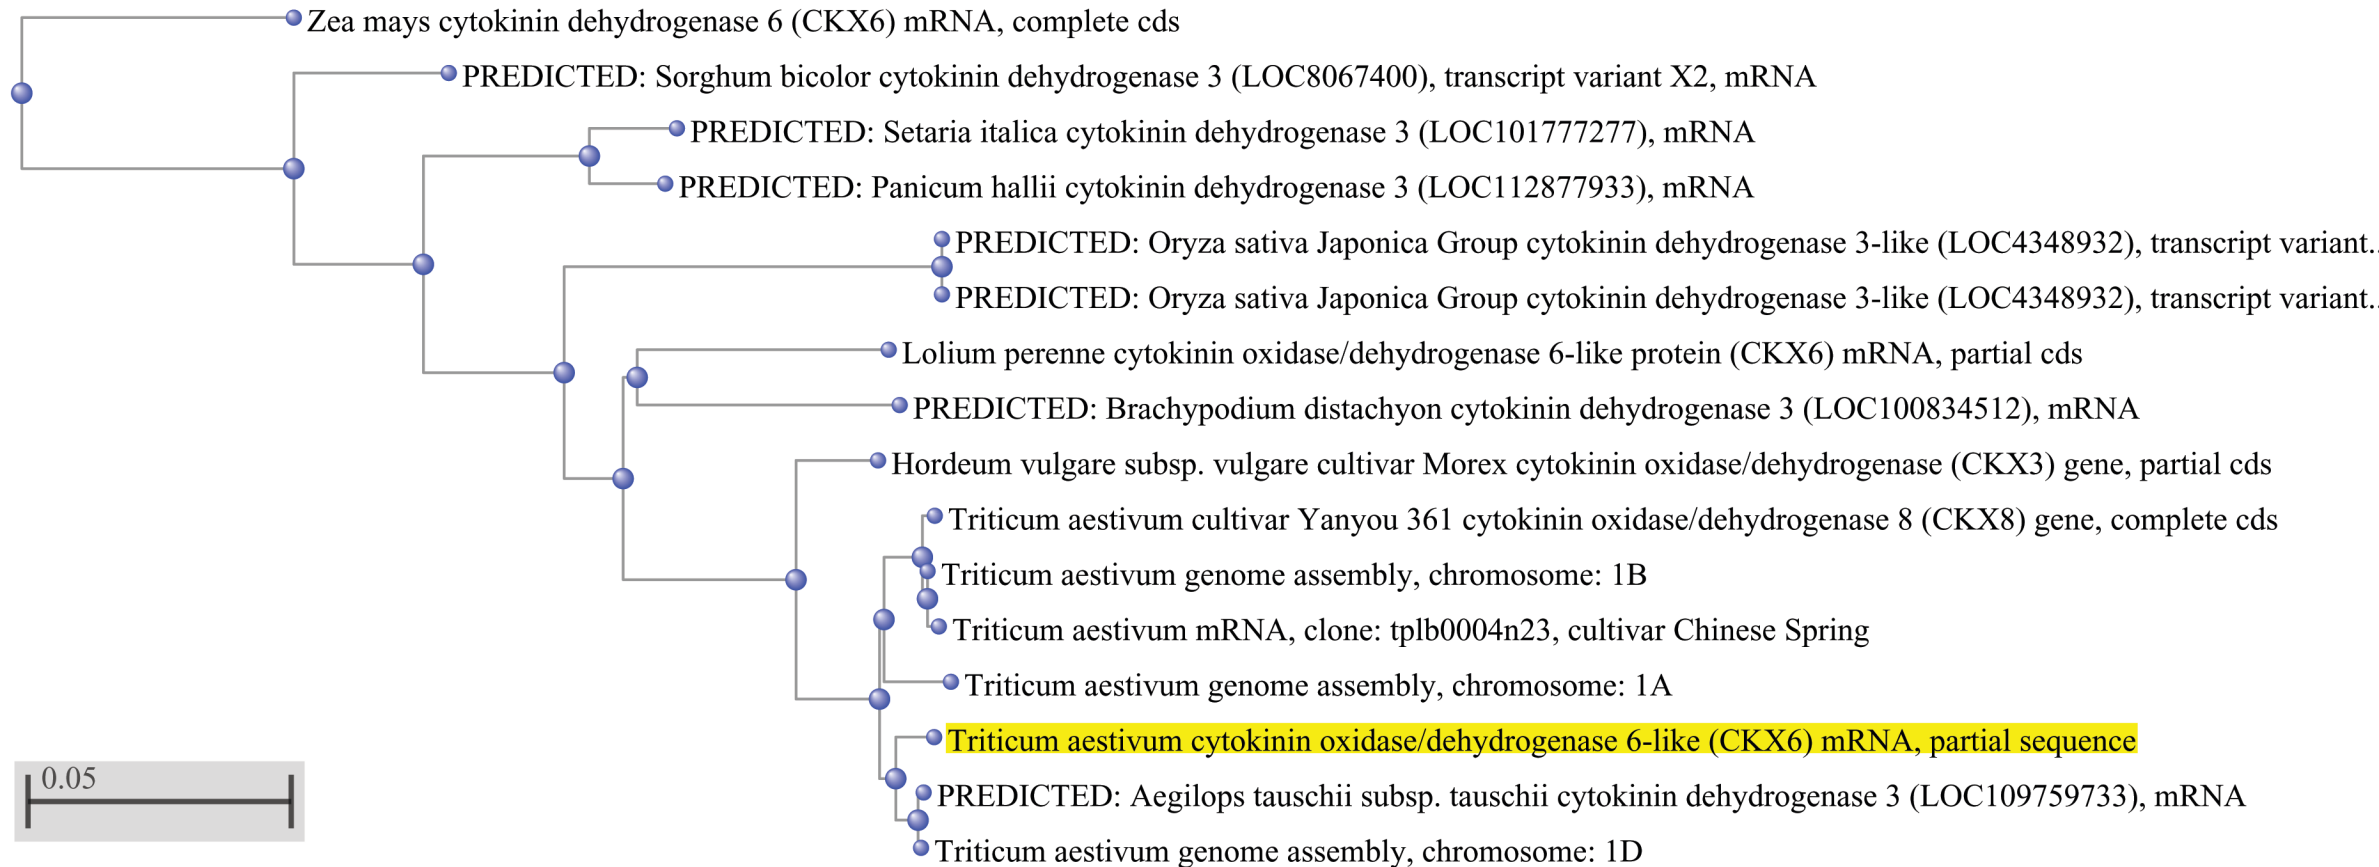

H

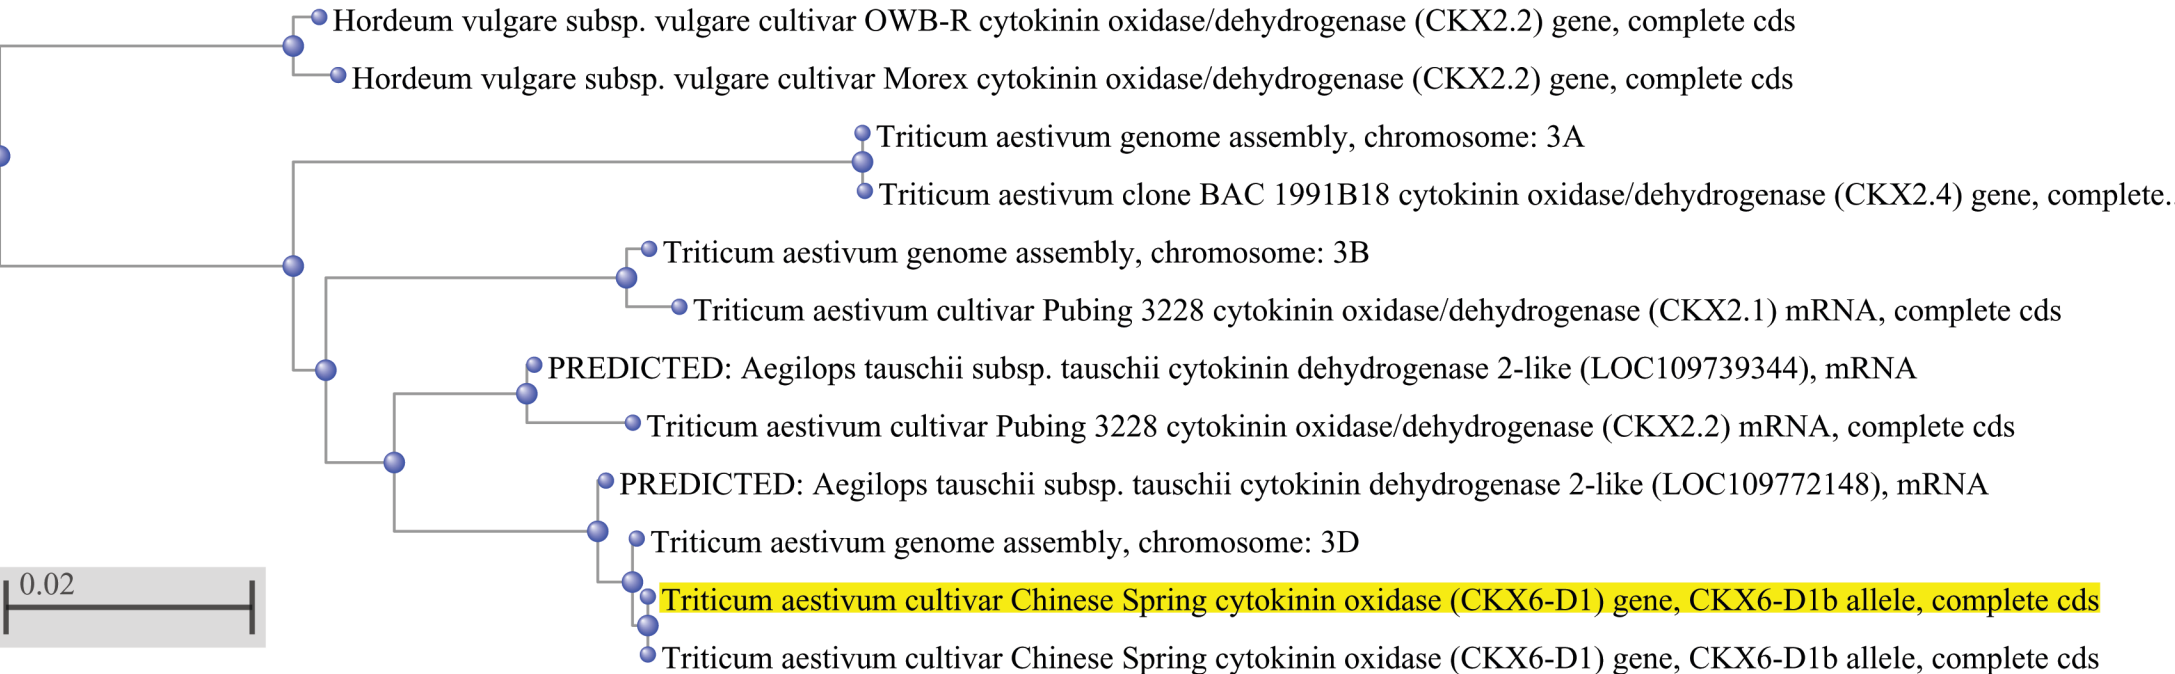



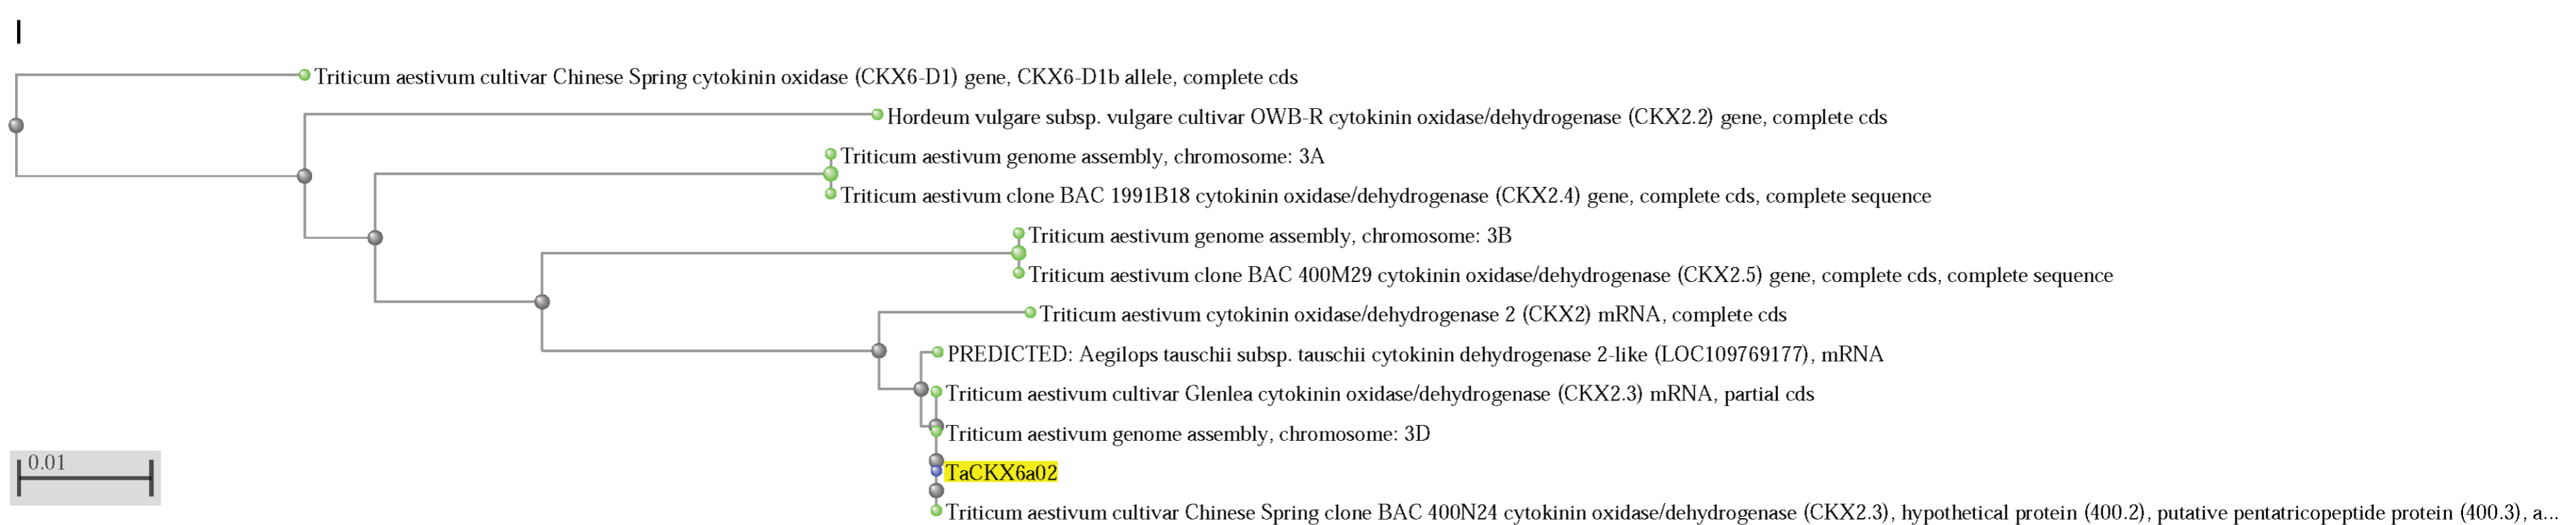

**J**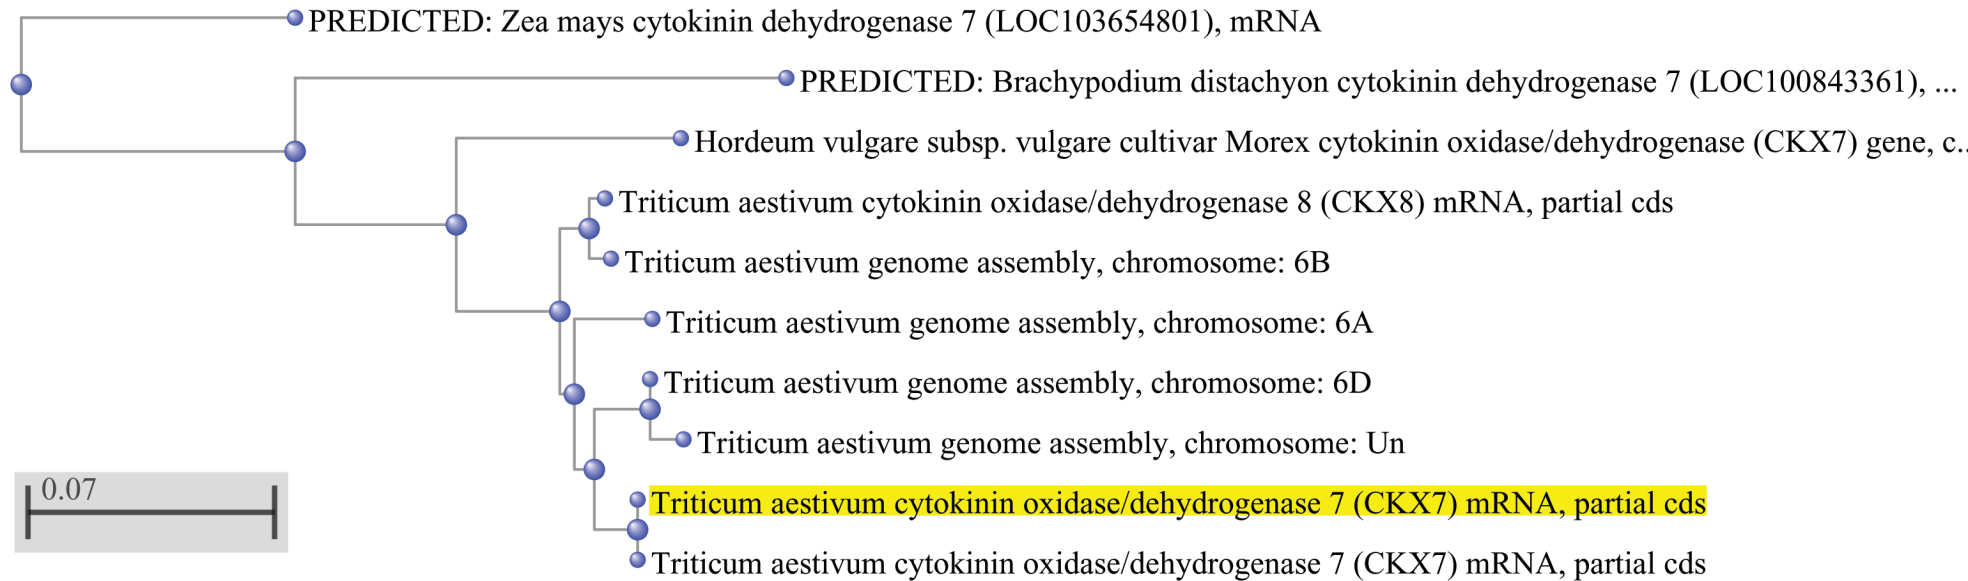

**K**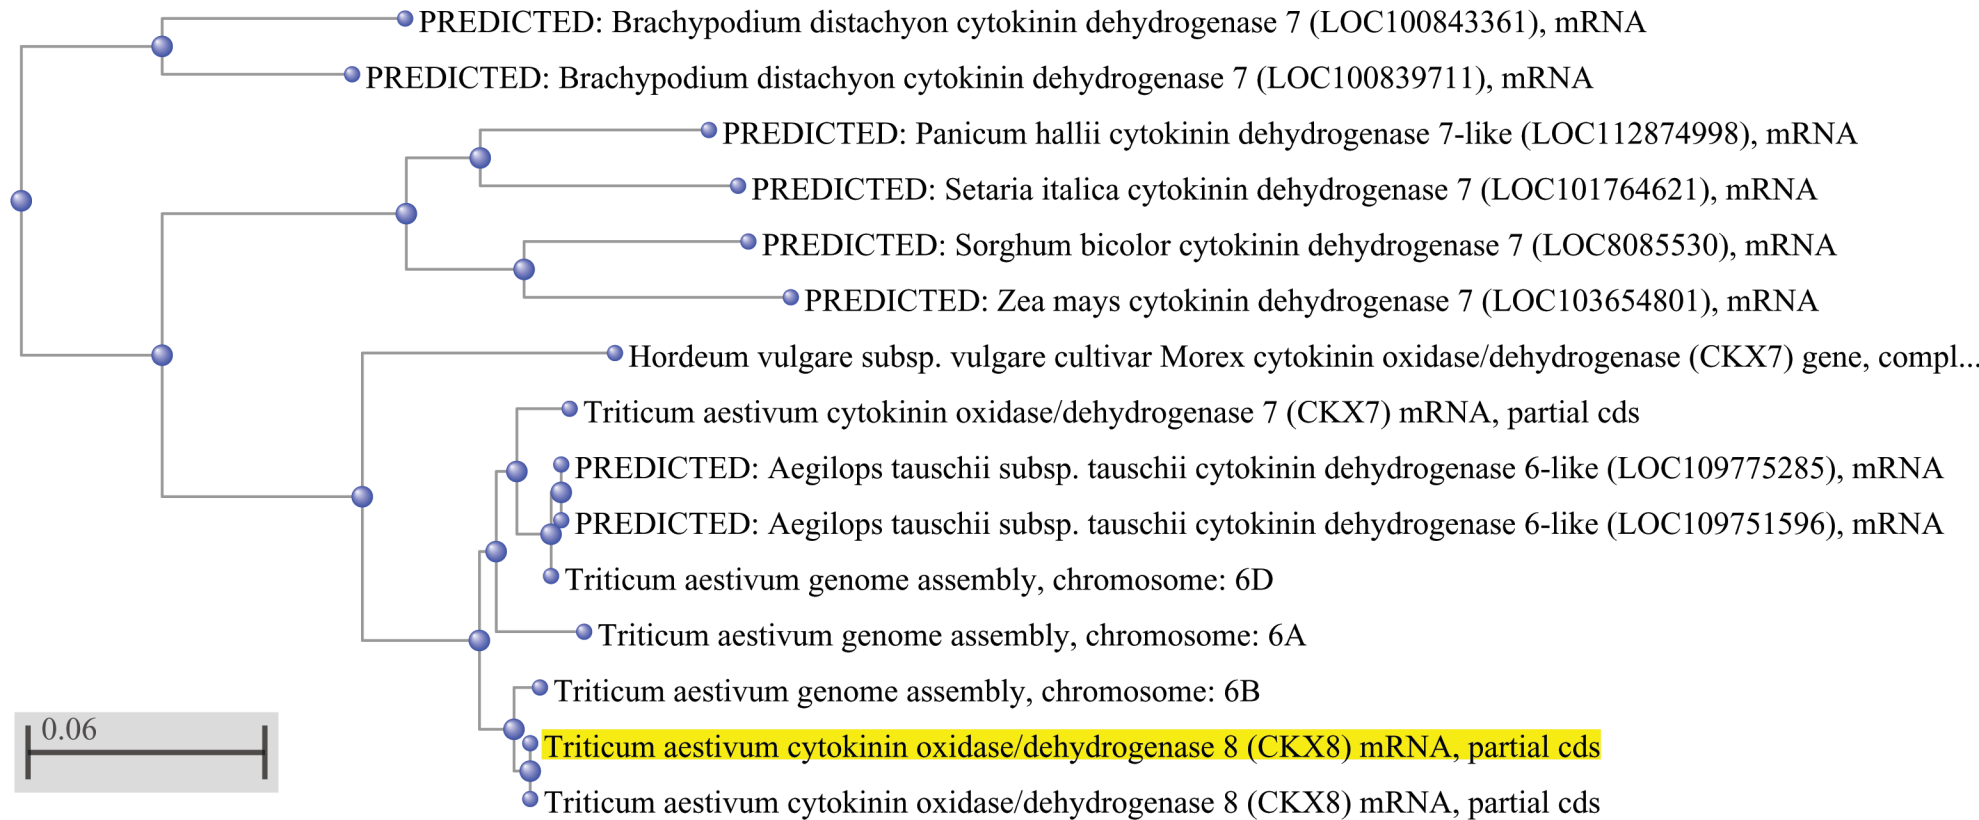

L

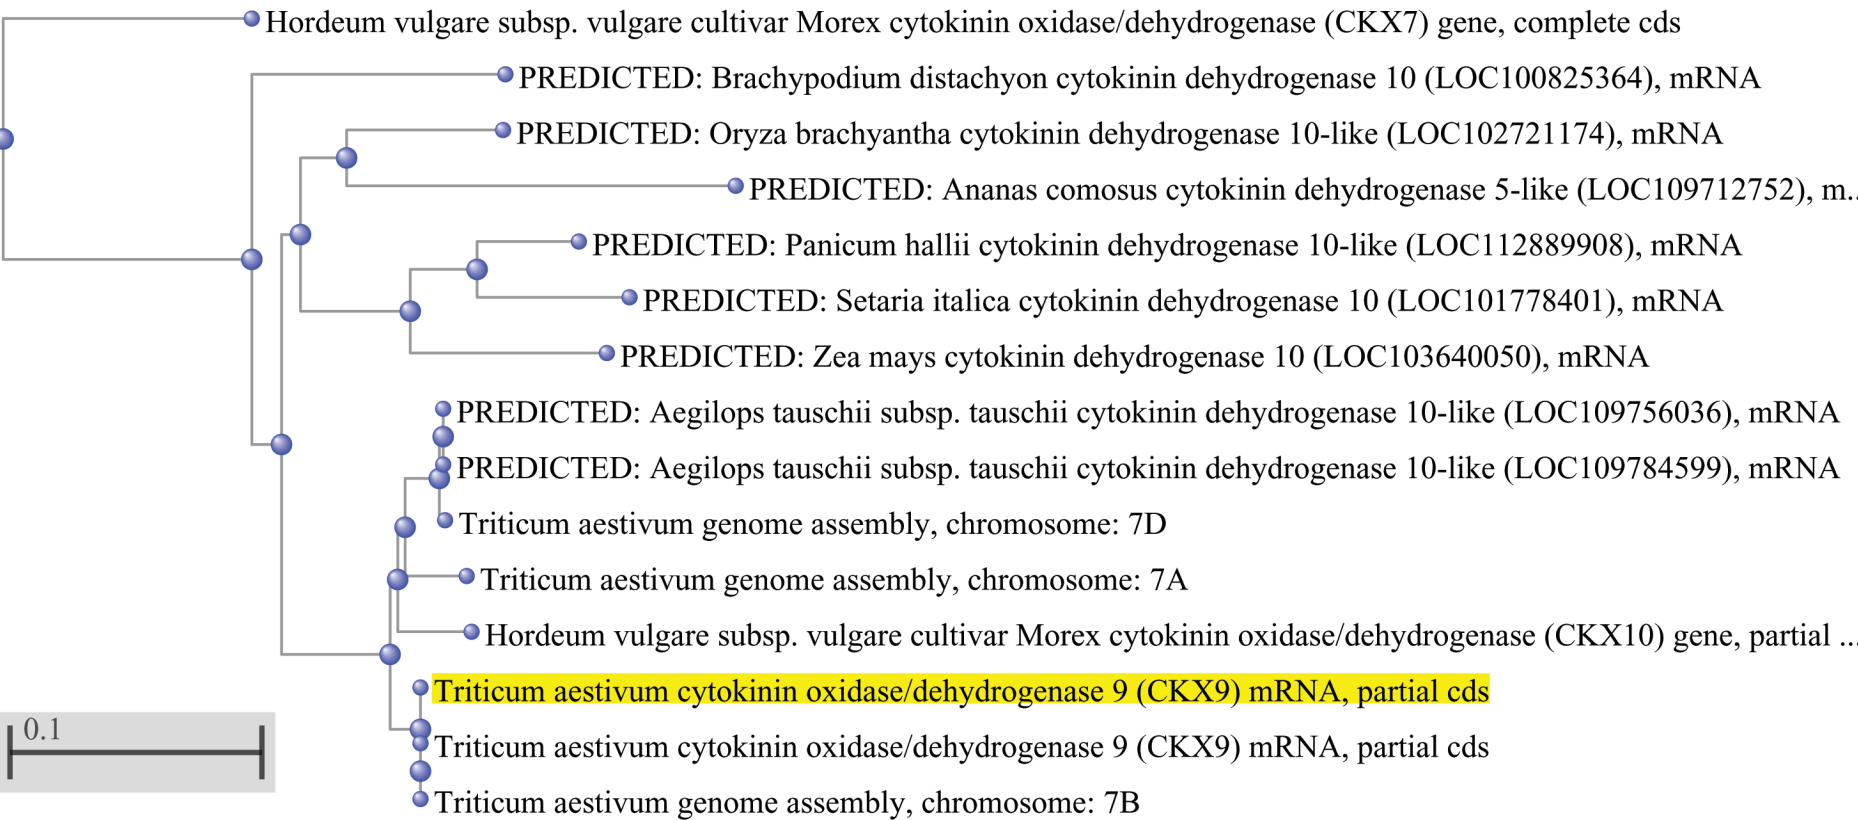

M

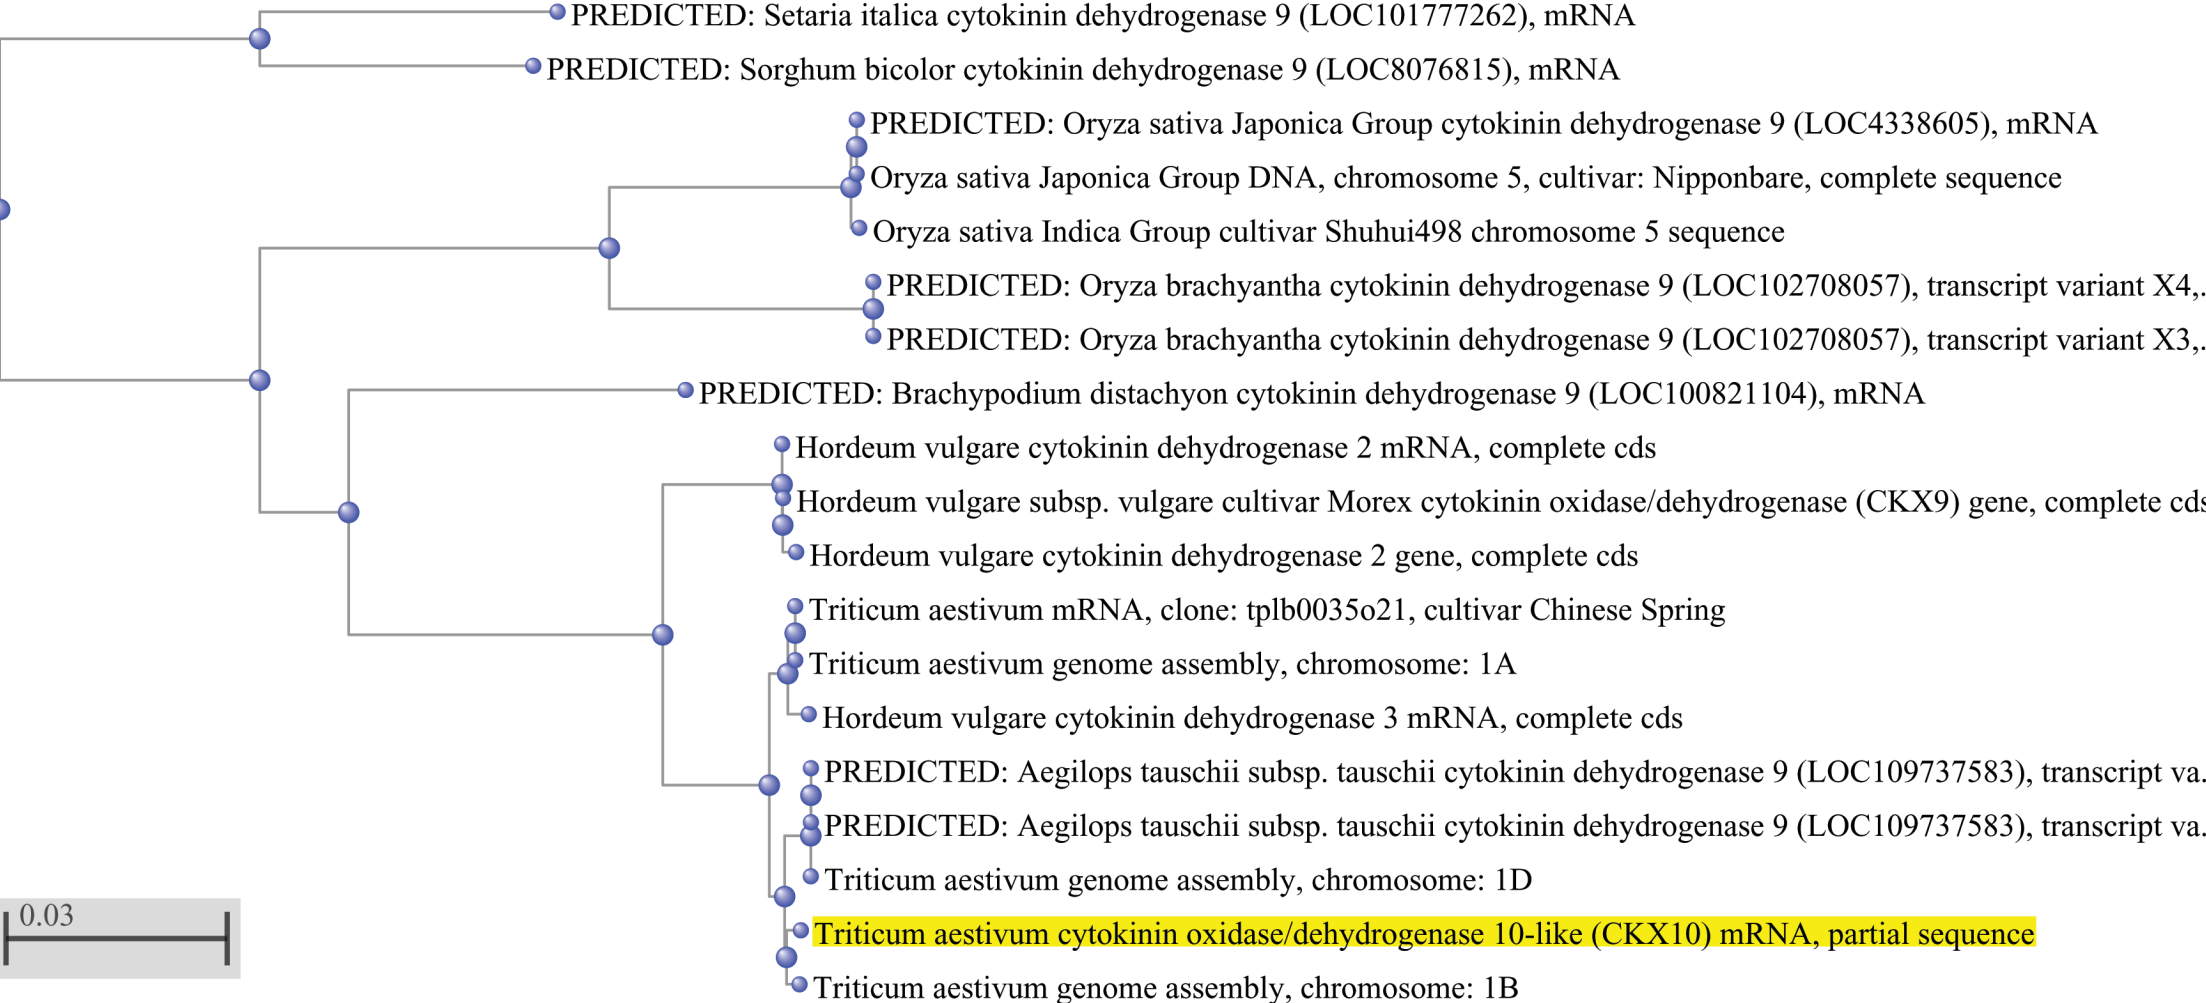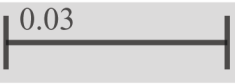

N

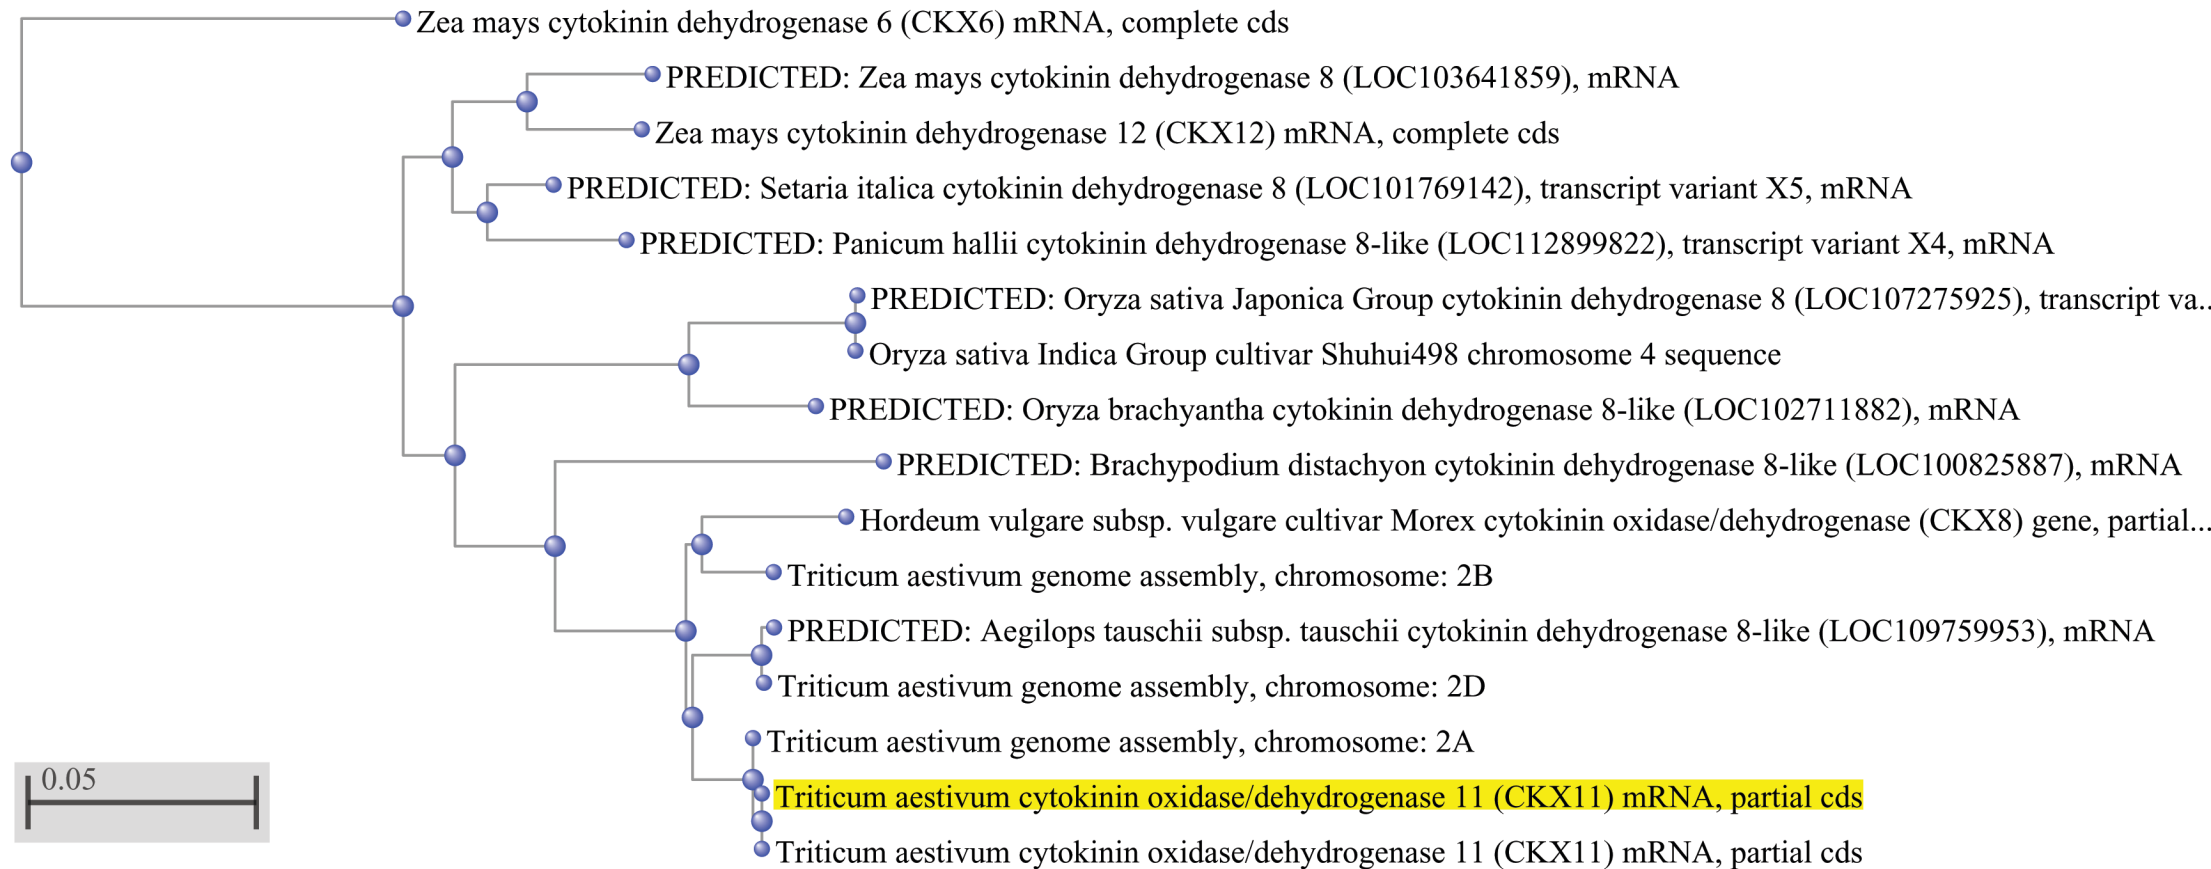

Supplement: pone.0214239.s003.pdf [file pone.0214239.s003.pdf]
