# Supplementary material for: Specificity of expression of TaCKX family genes in developing plants of wheat and their co-operation within and among organs
Source: PubMed Central journal article supplement (PMC6457499; doi:10.1371/journal.pone.0214239), 2019-04-10
Supplement: pone.0214239.s001.pdf [file pone.0214239.s001.pdf]

Table S1. Primer sequences designed for reference gene *Ref2* and each of *TaCKX* genes

|                 |                |      |                           |     |
|-----------------|----------------|------|---------------------------|-----|
| <i>Ref2</i>     | Ta2291R        | NCBI | GCTTCTGCCTGTCACATACGC     | 165 |
|                 | Ta2291F        |      | GCTCTCCAACAACATTGCCAAC    |     |
| <i>TaCKX1</i>   | TaCKX1_188R    |      | CCCAGGTACTCCTTGTACCCTAT   | 188 |
|                 | TaCKX1_188F    |      | GTCTACCCGCTCAACAAATCC     |     |
| <i>TaCKX2.1</i> | TaCKX2_1_R_205 |      | TATCACATACGCCATCCATGC     | 205 |
|                 | TaCKX2_1_F_205 |      | TTGATCGCGGAGCTAATCCA      |     |
| <i>TaCKX2.2</i> | TaCKX2_2_R_175 |      | ATCGTATCCTGGCCTCCTCA      | 175 |
|                 | TaCKX2_2_F_175 |      | TACCCCATGAACCGGAACAG      |     |
| <i>TaCKX2.3</i> | TaCKX2_3_R_144 |      | TCTCCTCGTTCTGCTCCTCC      | 144 |
|                 | TaCKX2_3_F_144 |      | TCTACCCCATGAACCGGGAC      |     |
| <i>TaCKX2.4</i> | TaCKX2_4_R_220 |      | GCCAAAAGTCACGATCCCCT      | 220 |
|                 | TaCKX2_4_F_220 |      | CTTCGTCCTTCTTCTCGGGC      |     |
| <i>TaCKX2.5</i> | TaCKX2_5_147R  |      | GGGCAGACAAAGCTAGACCA      | 147 |
|                 | TaCKX2_5_147F  |      | GCTAGCCAGAGCTACACGG       |     |
| <i>TaCKX3</i>   | TaCKX3_150R    |      | GAATTAGAGTTCACGGCTTGATG   | 150 |
|                 | TaCKX3_150F    |      | TTGTCAAGGGACTGTAGTAGGG    |     |
| <i>TaCKX4</i>   | TaCKX4_112_R   |      | CTCCAAAGTCACACCCTCTACAC   | 112 |
|                 | TaCKX4_112_F   |      | AAGAACACGCAGCATAGCAAC     |     |
| <i>TaCKX5</i>   | TaCKX5_3B_4R   |      | CATACATGACACCAACGTACATCTT | 150 |
|                 | TaCKX5_3B_4F   |      | GTCCGATTTTTGAGAAGACTGATT  |     |
| <i>TaCKX6</i>   | TaCKX6_182R    |      | CCGTGCTTGAATGTCTGC        | 182 |
|                 | TaCKX6_182F    |      | CACAAAGGAGGAGAAGGAGATG    |     |
| <i>TaCKX7</i>   | TaCKX7_R_144   |      | CTCGACTGTGGGTGGCTTC       | 144 |
|                 | TaCKX7_F_144   |      | CGGTCACGCATTCTCGACTT      |     |
| <i>TaCKX8</i>   | TaCKX8_R_198   |      | GGCGGTCGTCTCATCATAGT      | 198 |
|                 | TaCKX8_F_198   |      | TCTAAGCAGGCTAGCGAAGC      |     |
| <i>TaCKX9</i>   | TaCKX9_R_278   |      | GTCCCTGTTCATGGGGTACA      | 278 |
|                 | TaCKX9_F_278   |      | CCACGGTGGATCAGAAGCTC      |     |
| <i>TaCKX10</i>  | TaCKX10_R_167  |      | ACATAAAGCAATTTACCTGGACTTG | 167 |
|                 | TaCKX10_F_167  |      | GAGCTAAGGGCTTGTGGGA       |     |
| <i>TaCKX11</i>  | TaCKX11_R_184  |      | AGTCATGCACTGCAAACCTCTATG  | 184 |
|                 | TaCKX11_F_184  |      | GACCAAGAGCTTCTGATCTCAAT   |     |
