# Supplementary material for: Specificity of expression of TaCKX family genes in developing plants of wheat and their co-operation within and among organs
Source: PubMed Central journal article supplement (PMC6457499; doi:10.1371/journal.pone.0214239), 2019-04-10
Supplement: pone.0214239.s002.pdf [file pone.0214239.s002.pdf]

S2 Table. Homologous sequences of *TaCKX* and *HvCKX* retrieved from Ensemble Plants database.

| Gene                                        | Accession number<br>NCBI                               | Accession number<br>EP | Chrom.<br>location | Transcript          | No. of<br>exons/<br>coding<br>exons | Protein<br>(aa) | Ref.   |
|---------------------------------------------|--------------------------------------------------------|------------------------|--------------------|---------------------|-------------------------------------|-----------------|--------|
| <i>HvCKX1</i>                               | JF495479, AF362472,<br>BQ462284                        | HORVU3Hr1G019850       | 3H                 | HORVU3Hr1G019850.1  | 3                                   | 521             | [3]    |
| <i>HvCKX2.1</i>                             | JF495488, JF293078,<br>JF293074                        | HORVU3Hr1G027460       | 3H                 | HORVU3Hr1G027460.1  | 3                                   | 598             | [3]    |
|                                             |                                                        |                        |                    | HORVU3Hr1G027460.2  | 4                                   | 561             |        |
| <i>HvCKX2.2</i>                             | JF495489, JF293077,<br>JF293076, JF293075              | HORVU3Hr1G027430       | 3H                 | HORVU3Hr1G027430.1  | 2                                   | 264             | [3]    |
|                                             |                                                        |                        |                    | HORVU1Hr1G042360.1  | 5                                   | 522             |        |
| <i>HvCKX3</i>                               | JF495480                                               | HORVU1Hr1G042360       | 1H                 | HORVU1Hr1G042360.2  | 6/5                                 | 522             | [3]    |
|                                             |                                                        |                        |                    | HORVU1Hr1G042360.8  | 6                                   | 528             |        |
|                                             |                                                        |                        |                    |                     |                                     |                 |        |
| <i>HvCKX4</i>                               | JF495481, BJ479455,<br>BJ479606                        | HORVU3Hr1G105360       | 3H                 | HORVU1Hr1G042360.1  | 5                                   | 530             | [3]    |
| <i>HvCKX5</i>                               | JF495482, AK370106,<br>BF264028, CB877904              | HORVU3Hr1G075920       | 3H                 | HORVU3Hr1G075920.1  | 5                                   | 532             | [3]    |
| <i>HvCKX7</i>                               | JF495483                                               | HORVU6Hr1G039690       | 6H                 | HORVU6Hr1G039690.1  | 1                                   | 533             | [3]    |
|                                             |                                                        | HORVU6Hr1G039680       | 6H                 | HORVU6Hr1G039680.1  | 1                                   | 533             |        |
| <i>HvCKX8</i>                               | AJ234763, JF495487                                     | HORVU2Hr1G090150       | 2H                 | HORVU2Hr1G090150.3  | 5                                   | 292             | [3]    |
|                                             |                                                        | HORVU2Hr1G090160       | 2H                 | HORVU2Hr1G090160.5  | 5                                   | 334             |        |
| <i>HvCKX9</i><br>(former<br><i>HxCKX2</i> ) | AF540382, AV835311,<br>AF490591, AY209184,<br>JF495484 | HORVU1Hr1G057860       | 1H                 | HORVU1Hr1G057860.6  | 5                                   | 526             | [3,12] |
|                                             |                                                        |                        |                    | HORVU1Hr1G057860.10 | 5                                   | 526             |        |
| <i>HvCKX10</i>                              | JF495485                                               | HORVU7Hr1G086710       | 7H                 | nontranslating CDS  |                                     |                 | [3]    |
| <i>HvCKX11</i>                              | JF495486, CA031729                                     | HORVU7Hr1G118130       | 7H                 | HORVU7Hr1G118130.3  | 6                                   | 515             | [3]    |
|                                             |                                                        |                        |                    | HORVU7Hr1G118130.4  | 6                                   | 511             |        |
|                                             |                                                        |                        |                    | HORVU7Hr1G118130.5  | 6                                   | 503             |        |
